# Supplementary material
Source: PubMed Central journal article supplement (PMC3501033)
Supplement: supp_M112.366617_jbc.M112.366617-1.pdf [file supp_M112.366617_jbc.M112.366617-1.pdf]

## Supplementary Figure 1

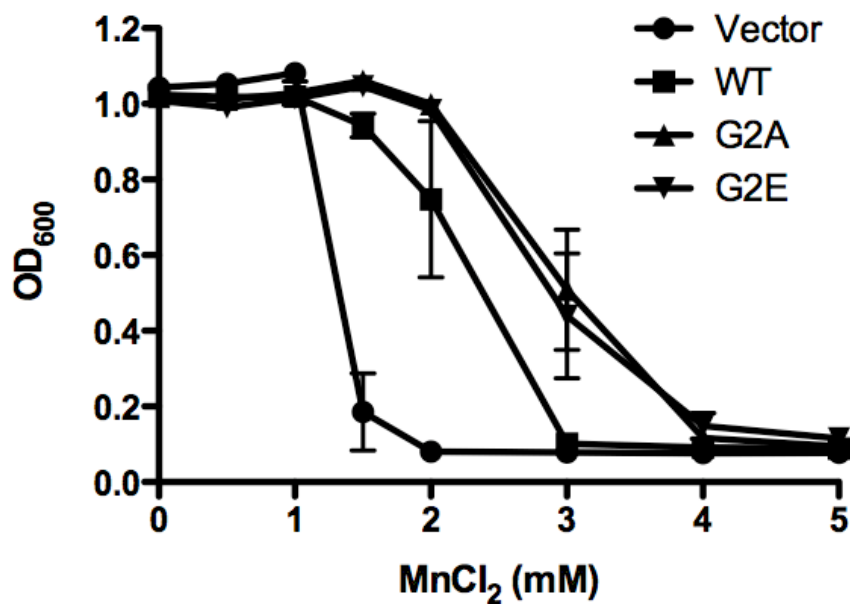

**Supplementary Figure 1.** Ion tolerance assays. *Cnb1* $\Delta$  yeast transformed with either *Cnb1*, *Cnb1*-G2A, *Cnb1*-G2E, or empty vector were inoculated into YPD containing increasing concentrations of MnCl<sub>2</sub> (mM) and grown at 30°C for two days. Growth was quantitated by measuring OD<sub>600</sub>. Data points are average of three independent yeast transformants assayed in parallel  $\pm$  standard error.
